# Supplementary material for: Probing the cytotoxicity of CdS–MPA and CdSe–MUA QDs on the bacterial pathogen Staphylococcus aureus using MALDI-MS
Source: Royal Society of Chemistry journal article supplement (doi:10.1039/c4ay00259h), 2014-01-01

## Supplementary material

# Probing the Cytotoxicity of CdS-MPA and CdSe-MUA QDs on Staphylococcus aureus using MALDI-MS and Epifluorescence microscopy

**M Shahnawaz Khan,<sup>1</sup> Gangaraju Gedda,<sup>1</sup> Judy Gopal,<sup>2</sup> Hui-Fen Wu,<sup>1,2,3,4,5\*</sup>**

<sup>1</sup>Department of Chemistry, National Sun Yat-Sen University, Kaohsiung, 80424, Taiwan

<sup>2</sup>Doctoral Degree Program in Marine Biotechnology, National Sun Yat-Sen University, Kaohsiung 80424, Taiwan

<sup>3</sup>Center for Nanoscience and Nanotechnology, National Sun Yat-Sen University, Kaohsiung, 80424, Taiwan

<sup>4</sup>School of Pharmacy, College of Pharmacy, Kaohsiung Medical University, Kaohsiung, 800, Taiwan

<sup>5</sup>Institute of Medical Science and Technology, National Sun Yat-Sen University, 80424, Taiwan

\*Corresponding author. Phone: 886-7-5252000-3955. Fax: 886-7-525-3908.

E-mail: [hwu@faculty.nsysu.edu.tw](mailto:hwu@faculty.nsysu.edu.tw) (Prof. Hui-Fen Wu)

Contract/grant sponsor: National Science Council, Taiwan

**Fig. Scheme**

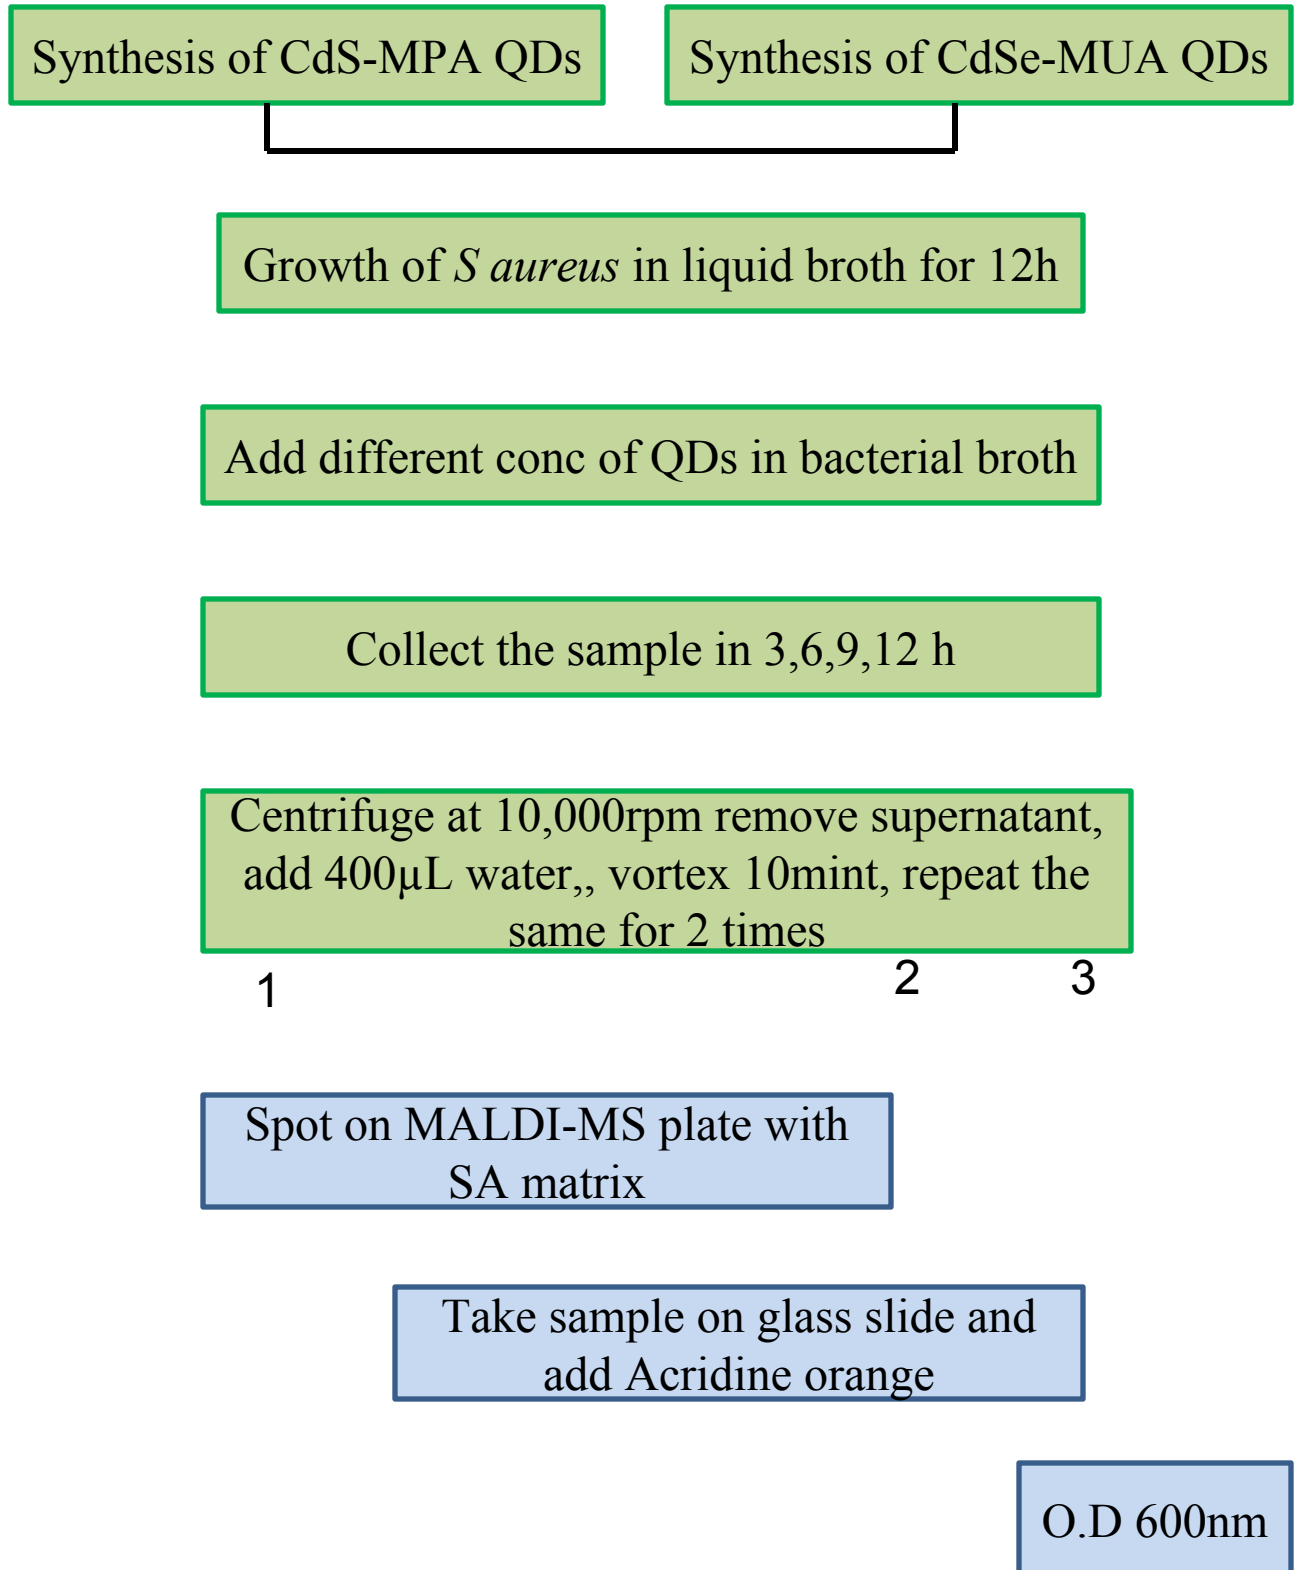

Fig S 1 A.

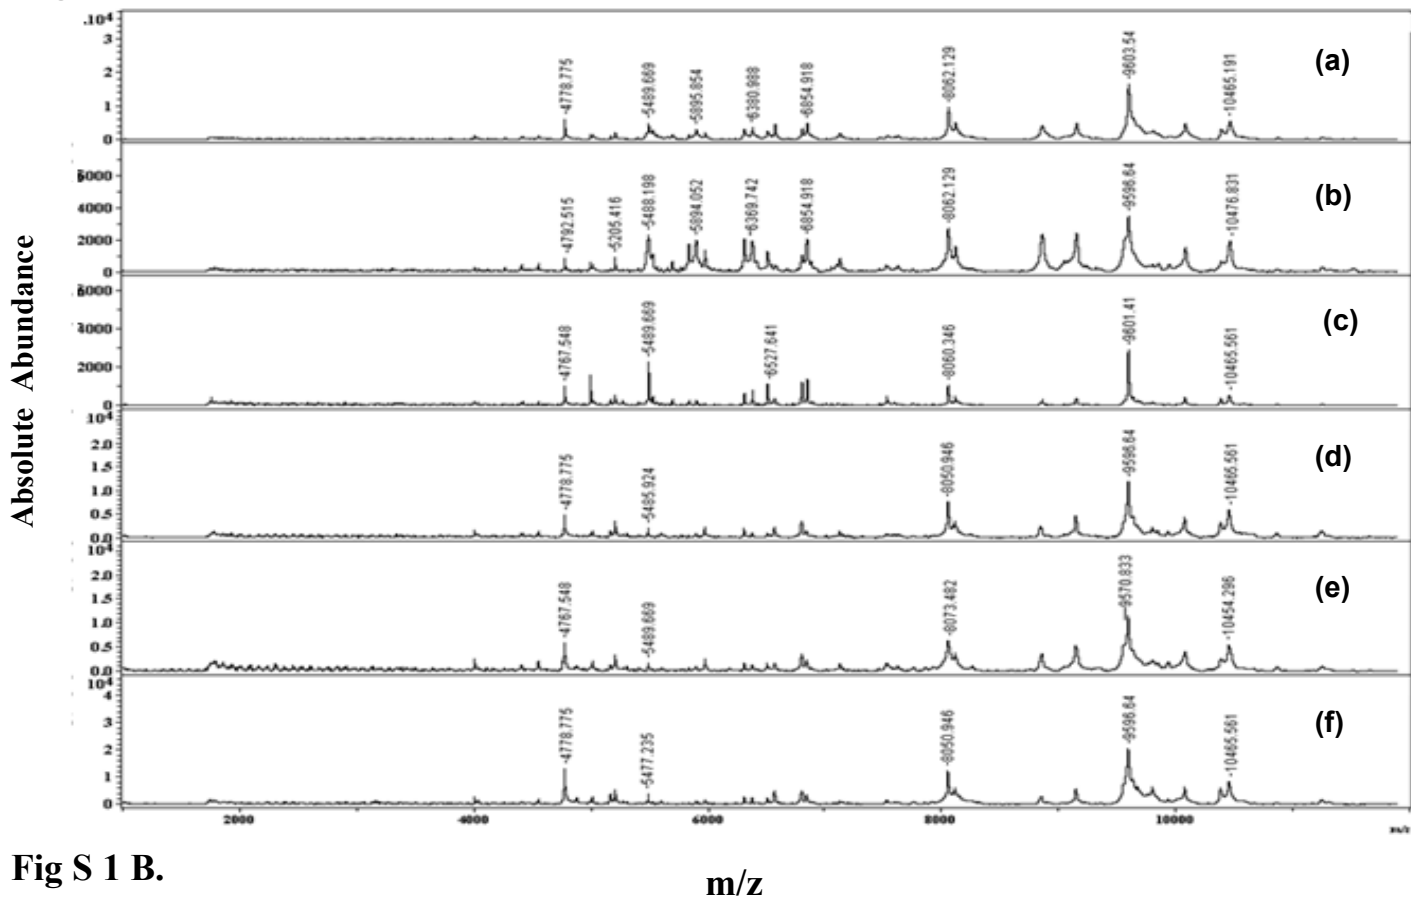

Fig S 1 B.

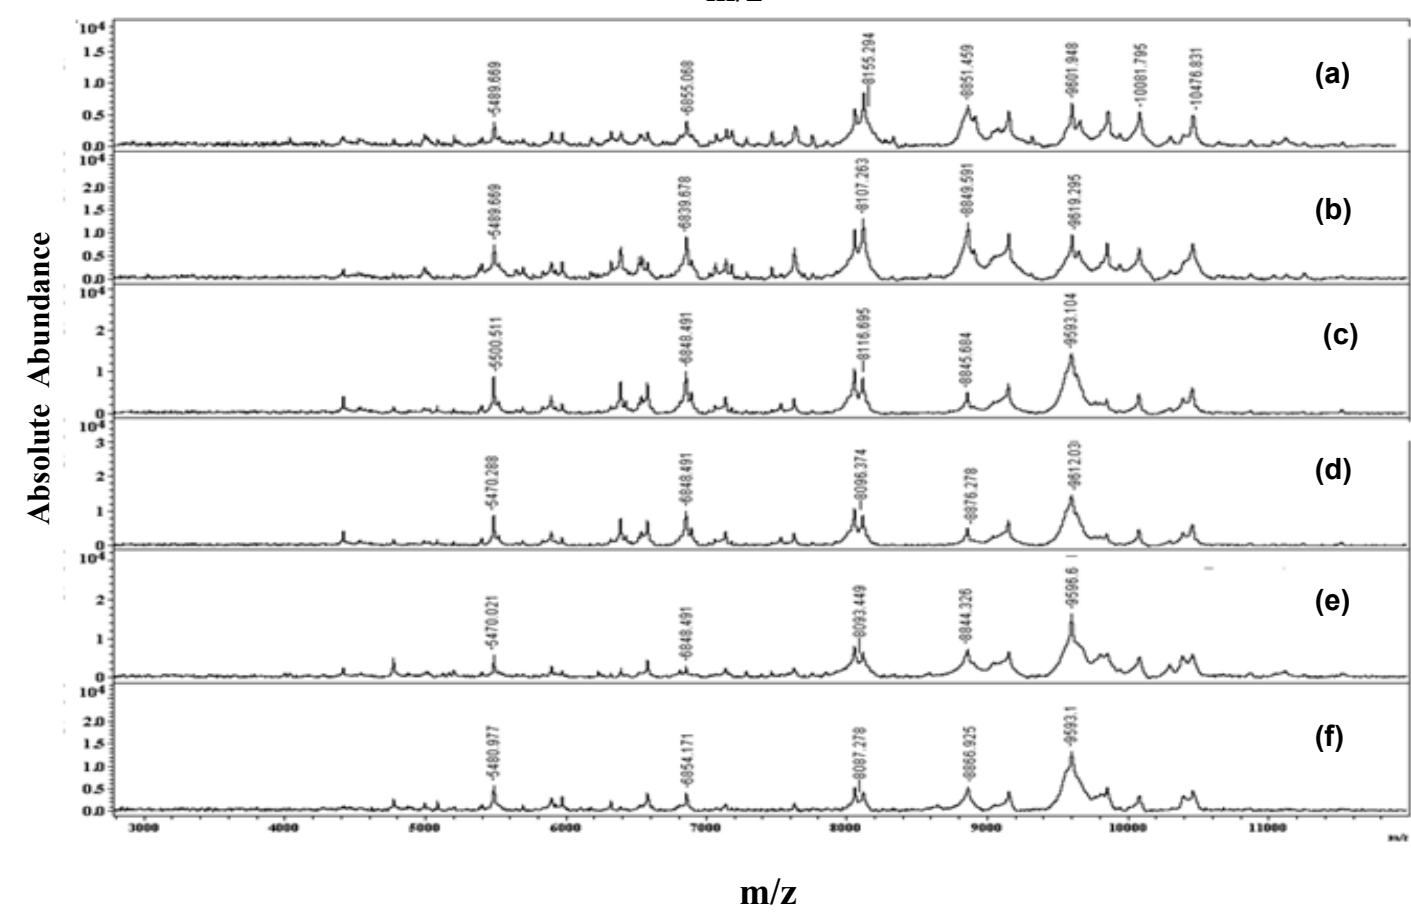

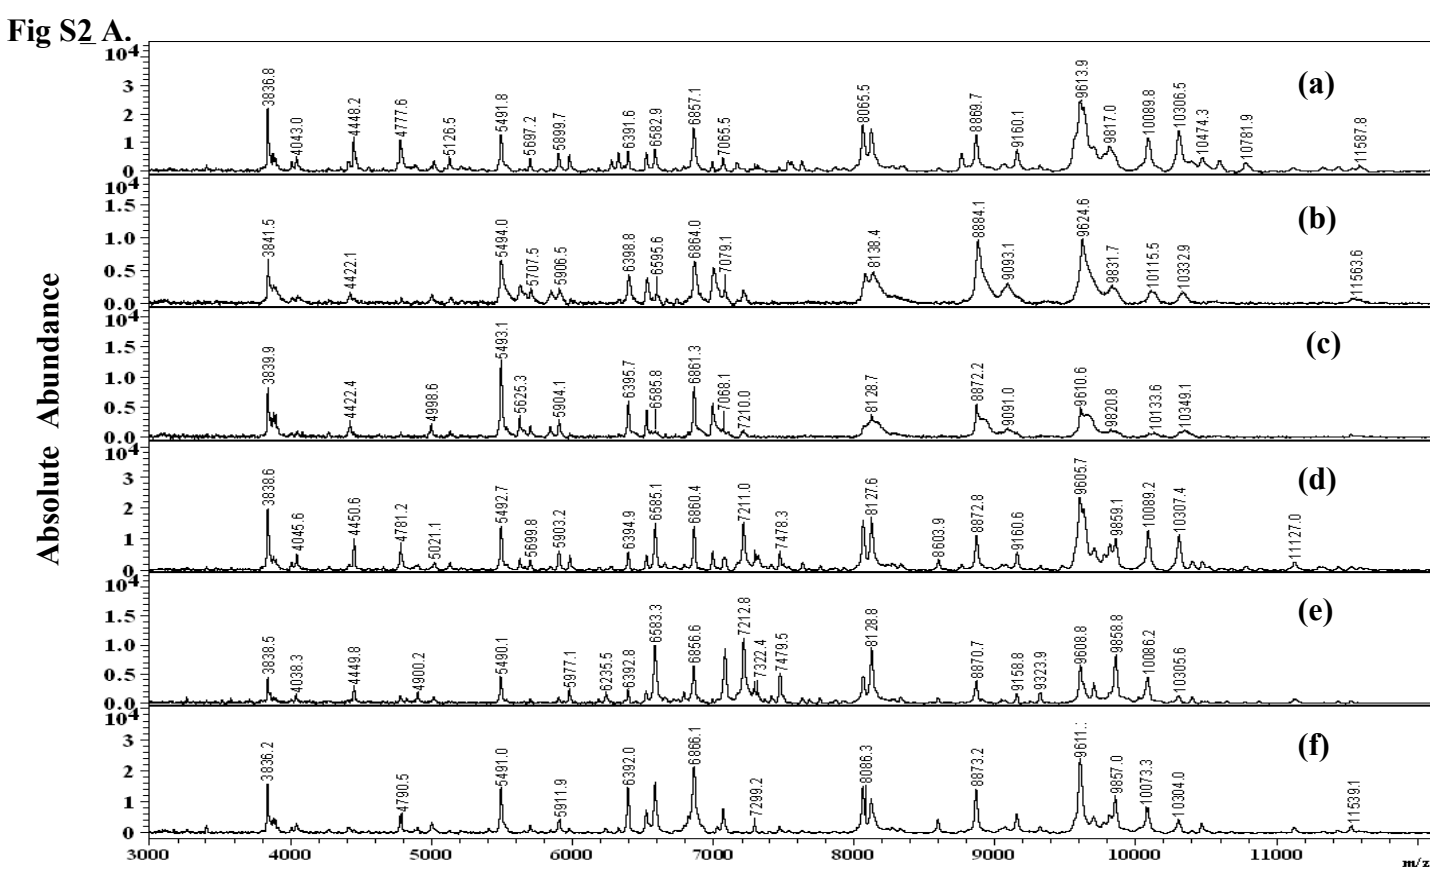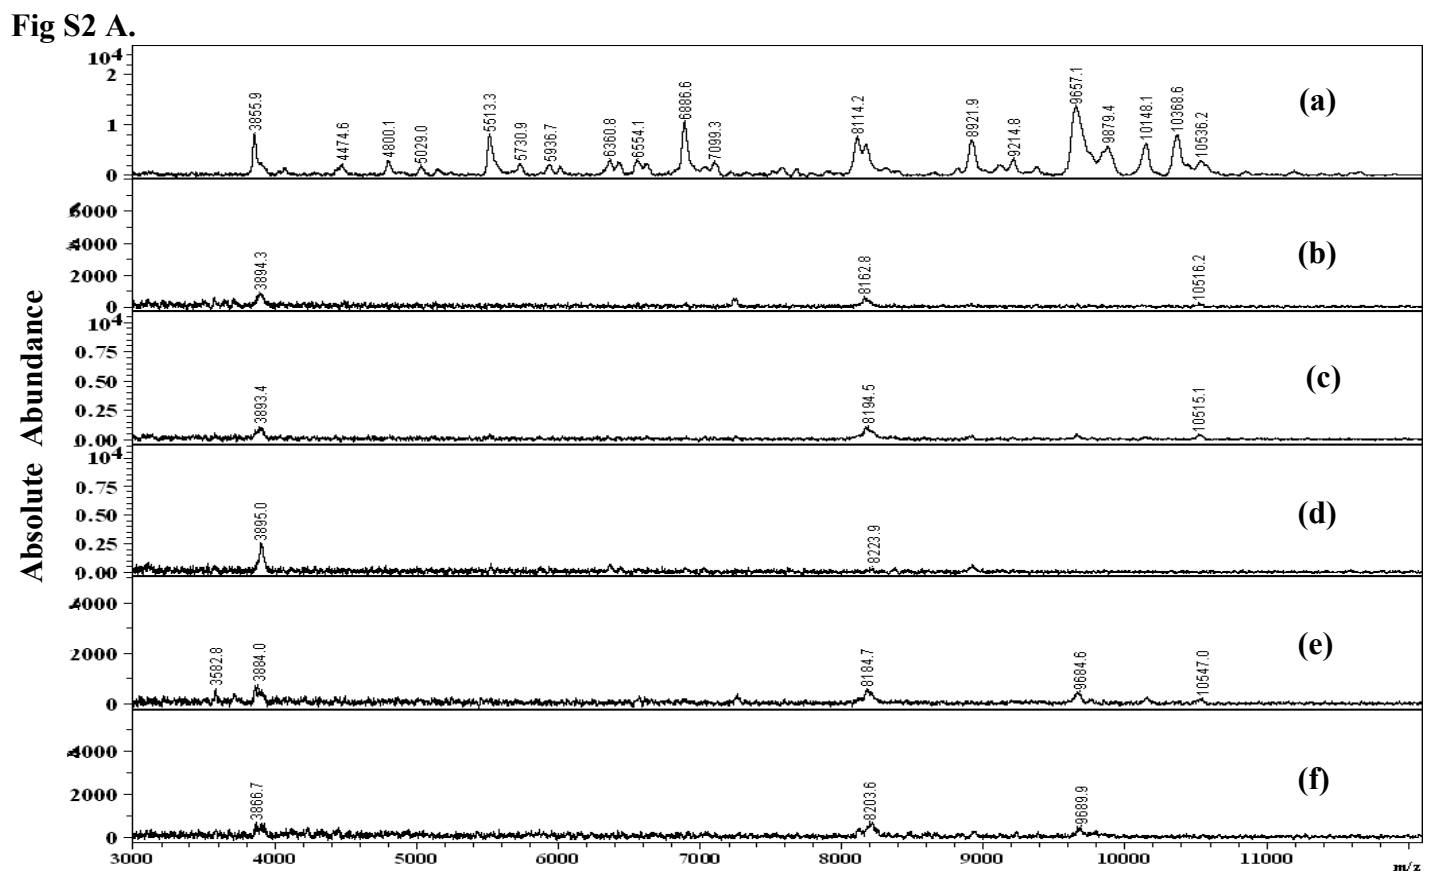

Fig S 3 A.

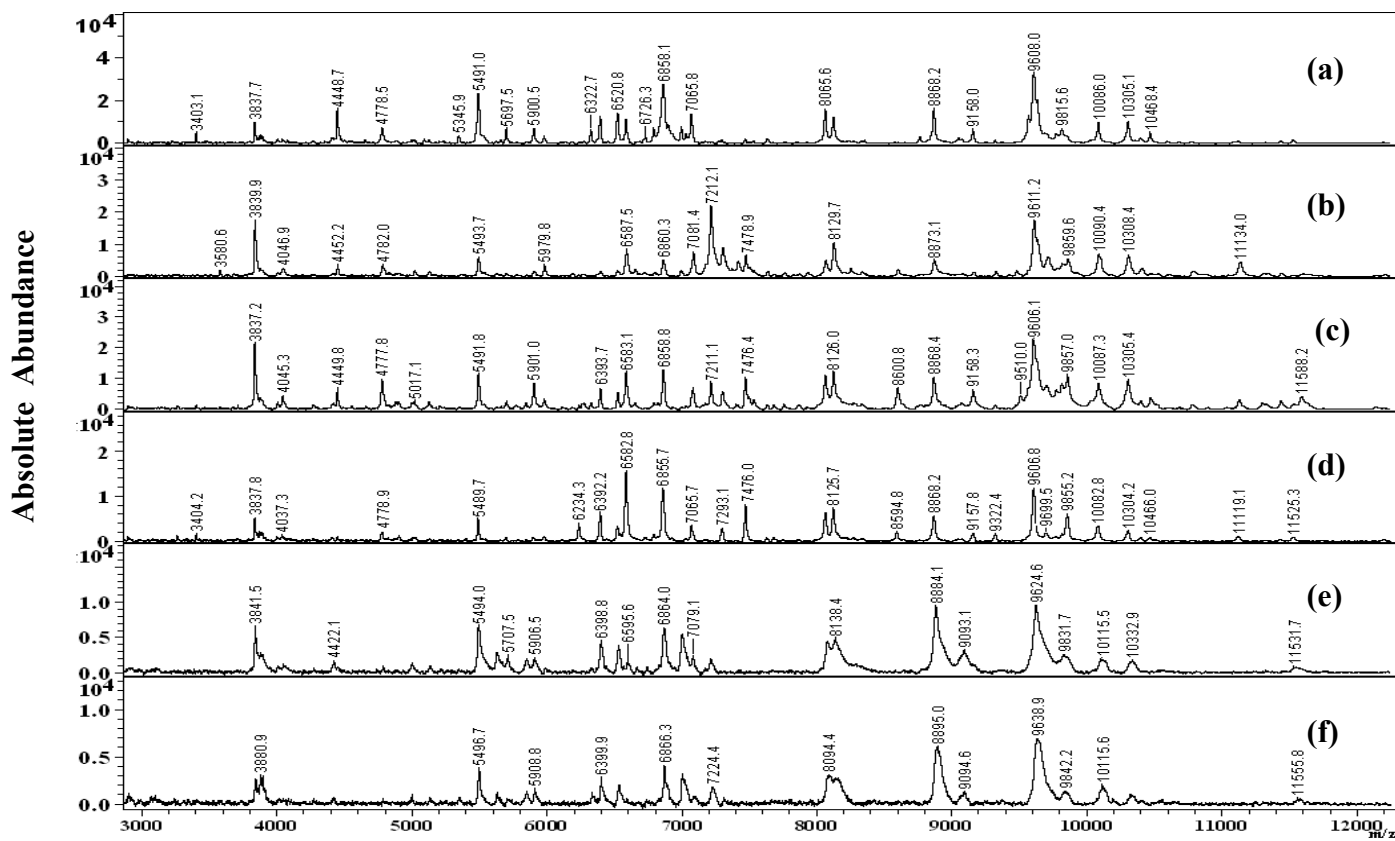

Fig S 3 B.

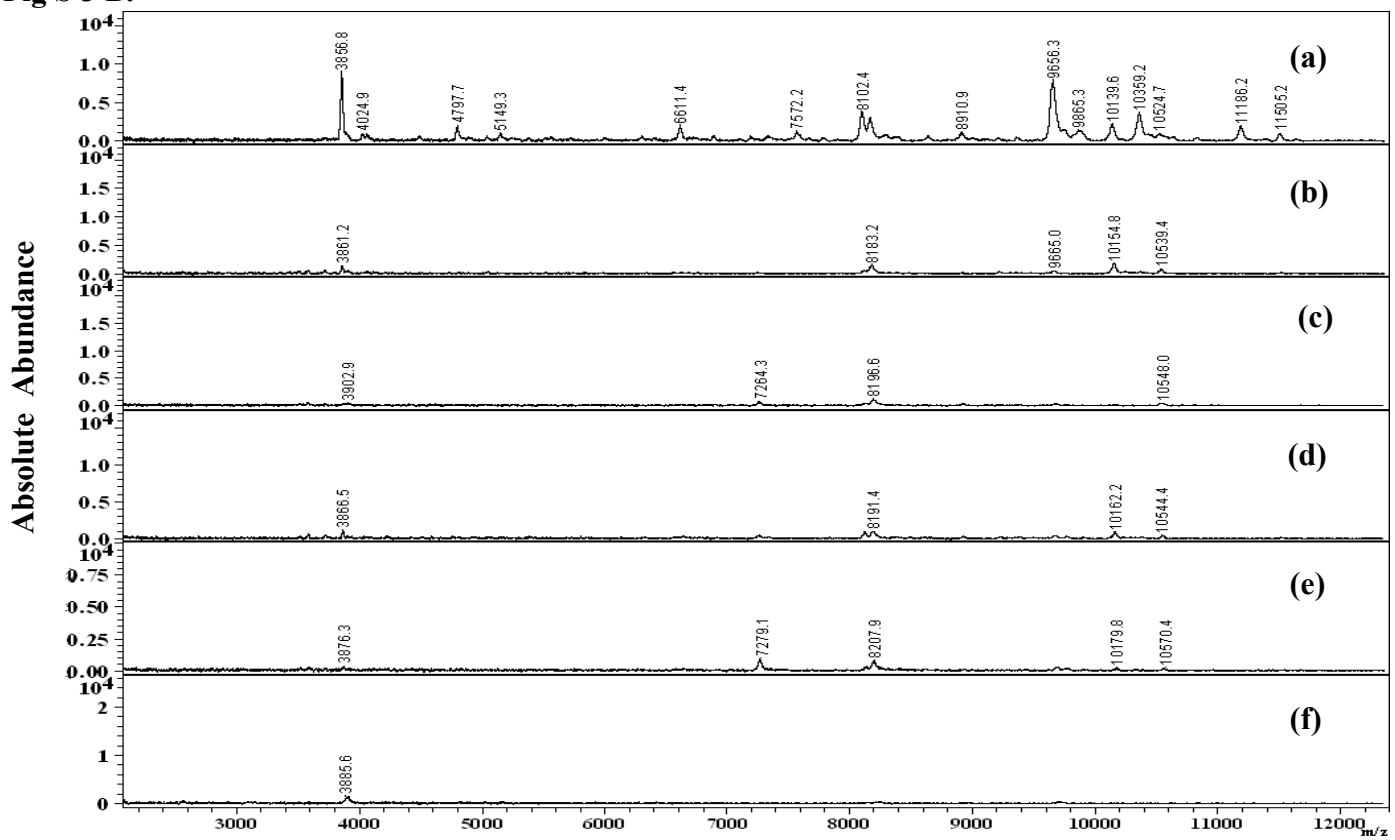

Fig S4 A.

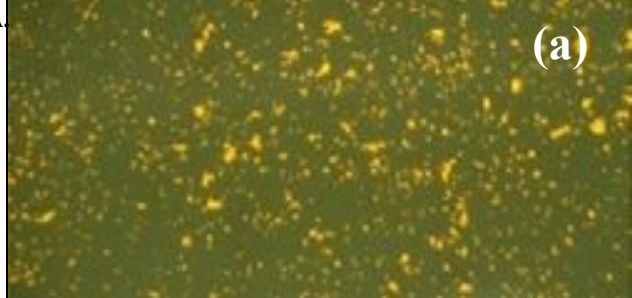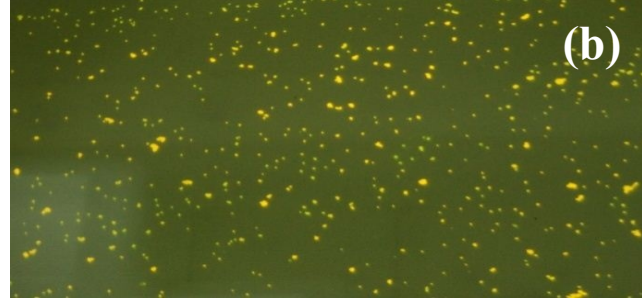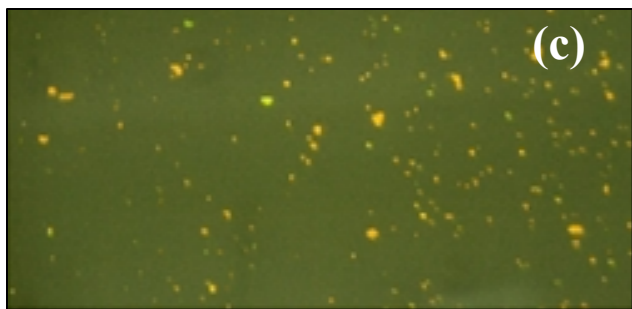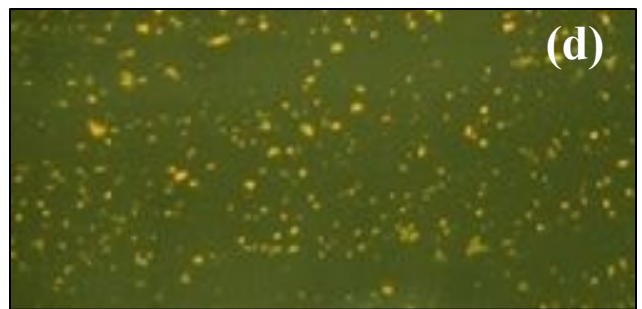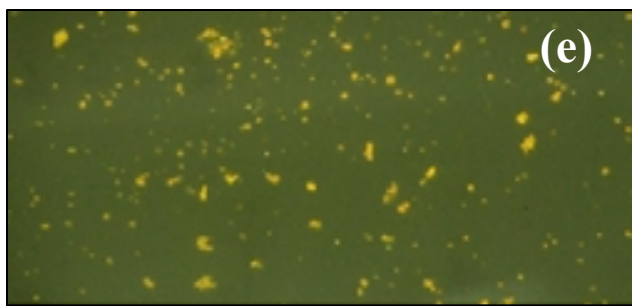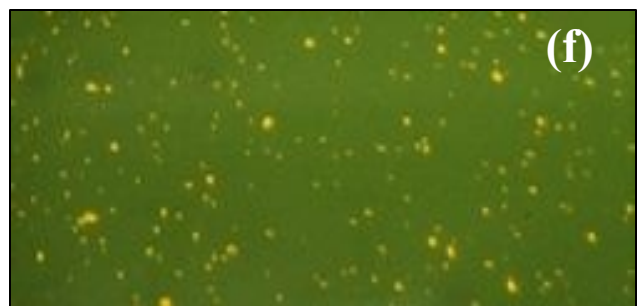

Fig S4 B.

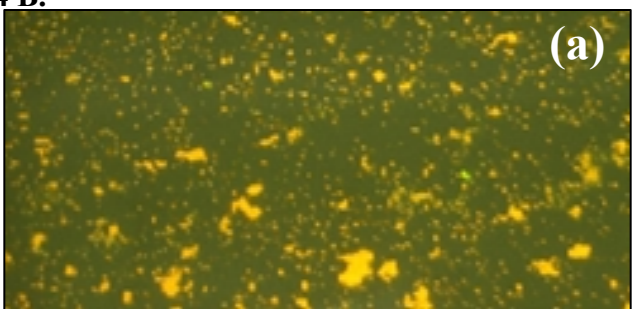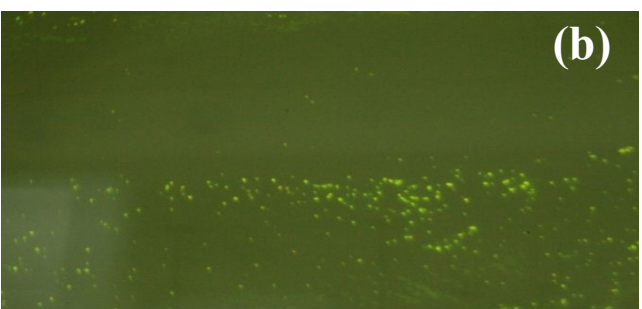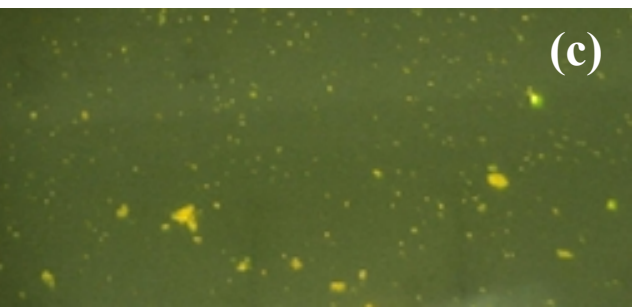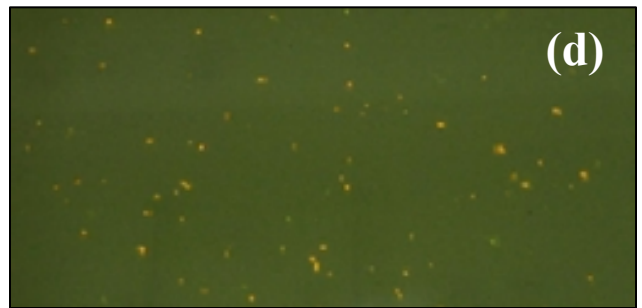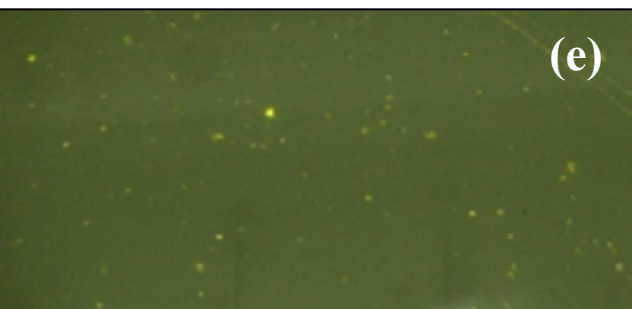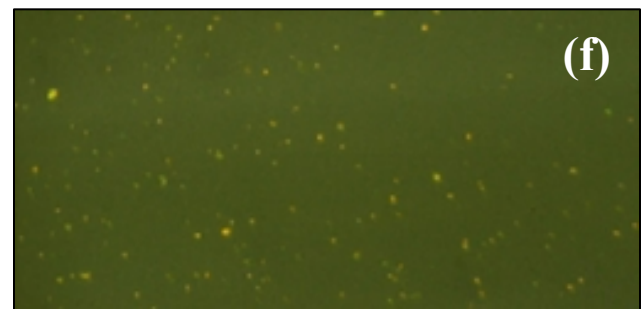

Supplement: c4ay00259h2.pdf [file c4ay00259h2.pdf]
